# Supplementary material for: Well-dispersed Au co-catalyst deposited on a rutile TiO2 photocatalyst via electron traps
Source: Royal Society of Chemistry journal article supplement (doi:10.1039/d2cp06064g), 2023-01-01
Supplement: d2cp06064g1.pdf [file d2cp06064g1.pdf]

Electronic Supplementary Information

## Well-dispersed Au co-catalyst deposited on rutile TiO<sub>2</sub> photocatalyst via electron traps

Tomoki Akiyama, Haruki Nagakawa, and Tetsu Tatsuma

Institute of Industrial Science, The University of Tokyo, Tokyo 153-8505, Japan.

E-mail: tatsuma@iis.u-tokyo.ac.jp

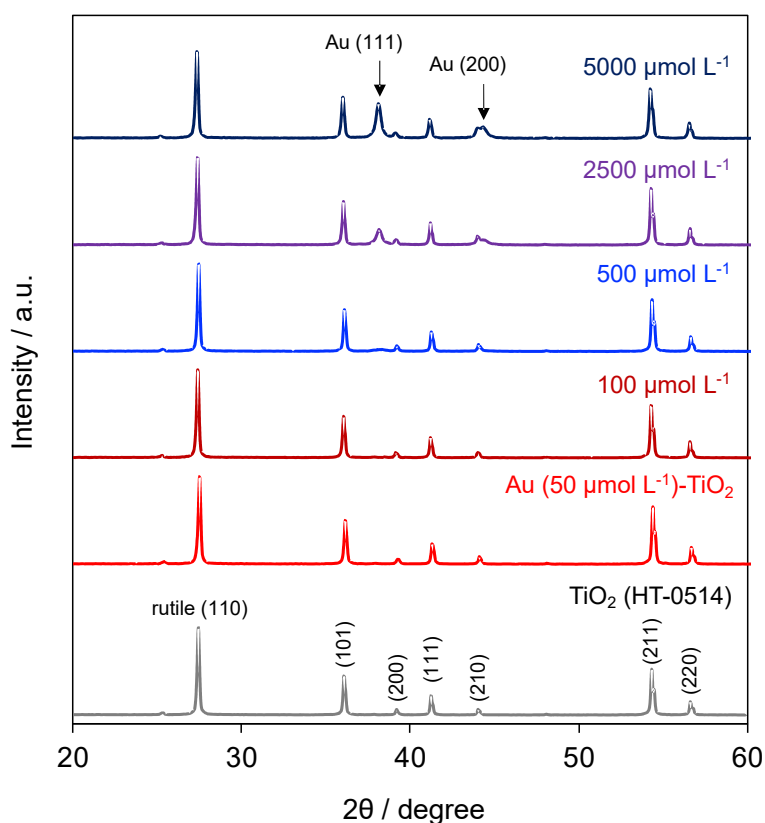

**Fig. S1.** XRD patterns of rutile TiO<sub>2</sub> particles (HT-0514) and those with Au deposited by the PD method at different [AuCl<sub>4</sub>]<sup>-</sup> concentrations. The diffraction peaks correspond to rutile phase TiO<sub>2</sub> (JCPDS pdf No. 75-1537) and Au (JCPDS pdf No. 04-0784) are indicated.

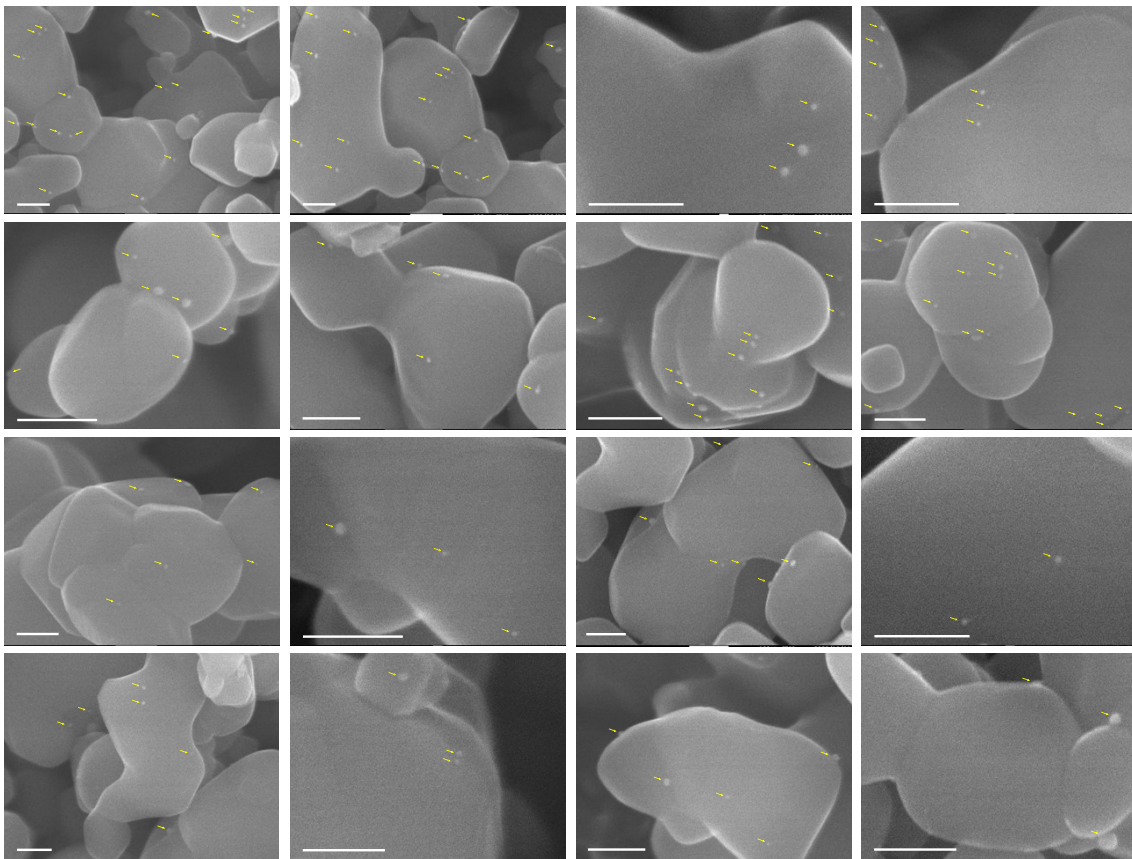

**Fig. S2.** SEM images of Au-TiO<sub>2</sub> sample prepared by the ETD method at 50  $\mu\text{mol L}^{-1}$  [AuCl<sub>4</sub>]. The Au nanoparticles counted for the size histogram in Fig. 3d are indicated with the yellow arrows. Scale bars indicate 100 nm.

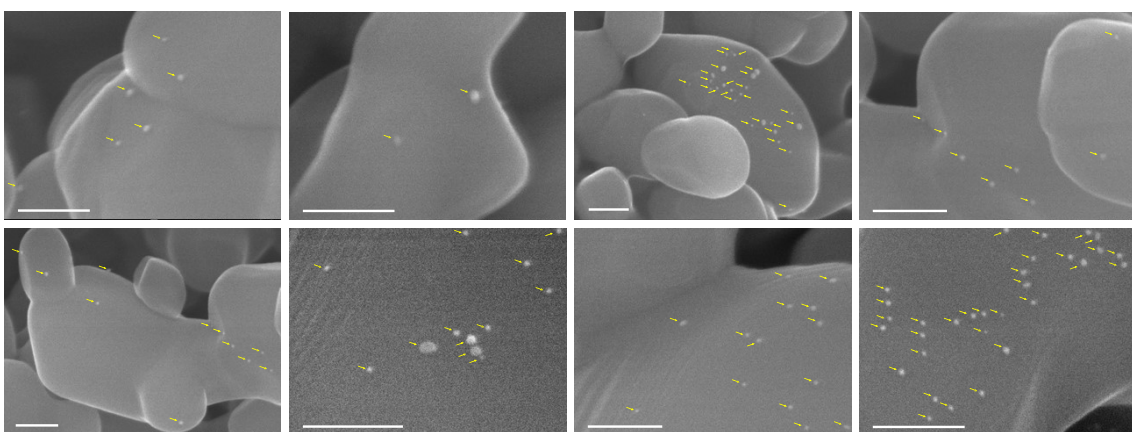

**Fig. S3.** SEM images of Au-TiO<sub>2</sub> sample prepared by the PD method at 50  $\mu\text{mol L}^{-1}$  [AuCl<sub>4</sub>]. The Au nanoparticles counted for the size histogram in Fig. 3e are indicated with the yellow arrows. Scale bars indicate 100 nm.

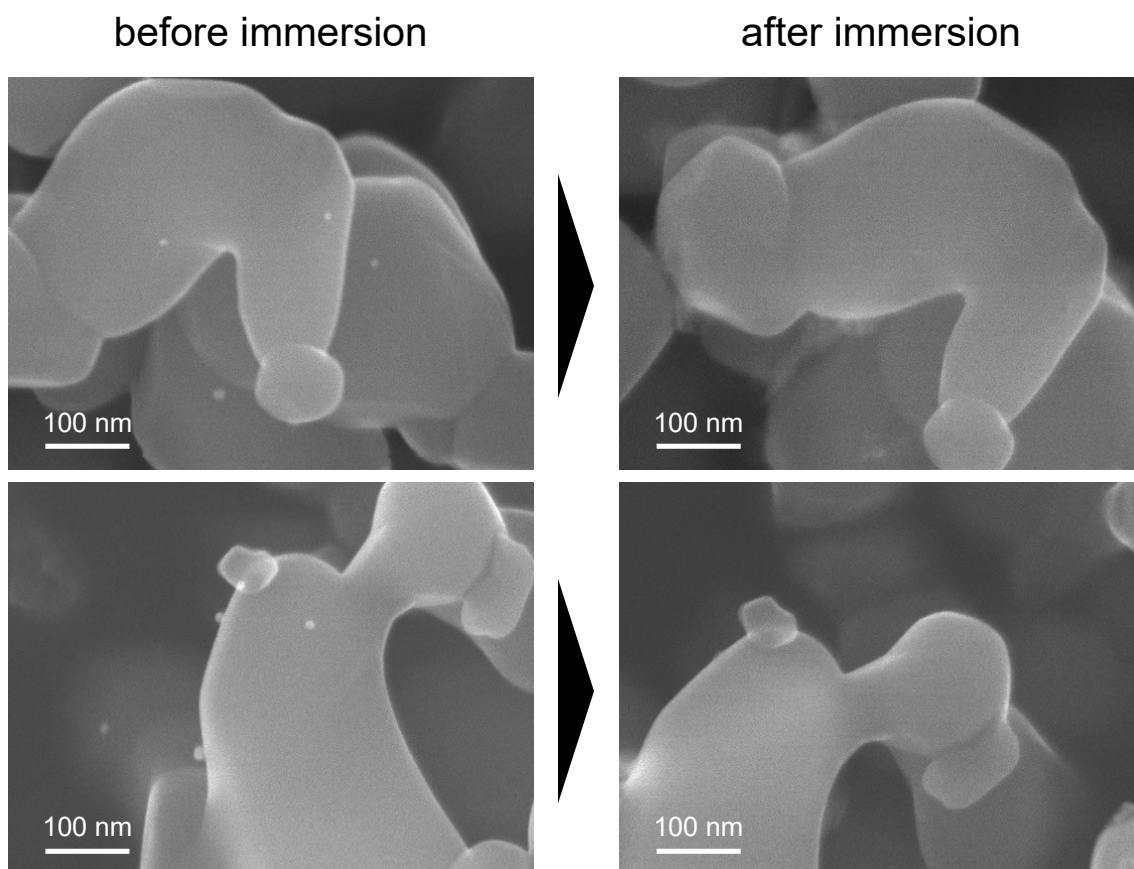

**Fig. S4.** SEM images of Au-TiO<sub>2</sub> sample on an adhesive carbon tape before and after immersion for 10 min in a solution containing I<sub>2</sub> and KI, in which Au is soluble. The sample was prepared by the ETD method at 50 μmol L<sup>-1</sup> [AuCl<sub>4</sub>].

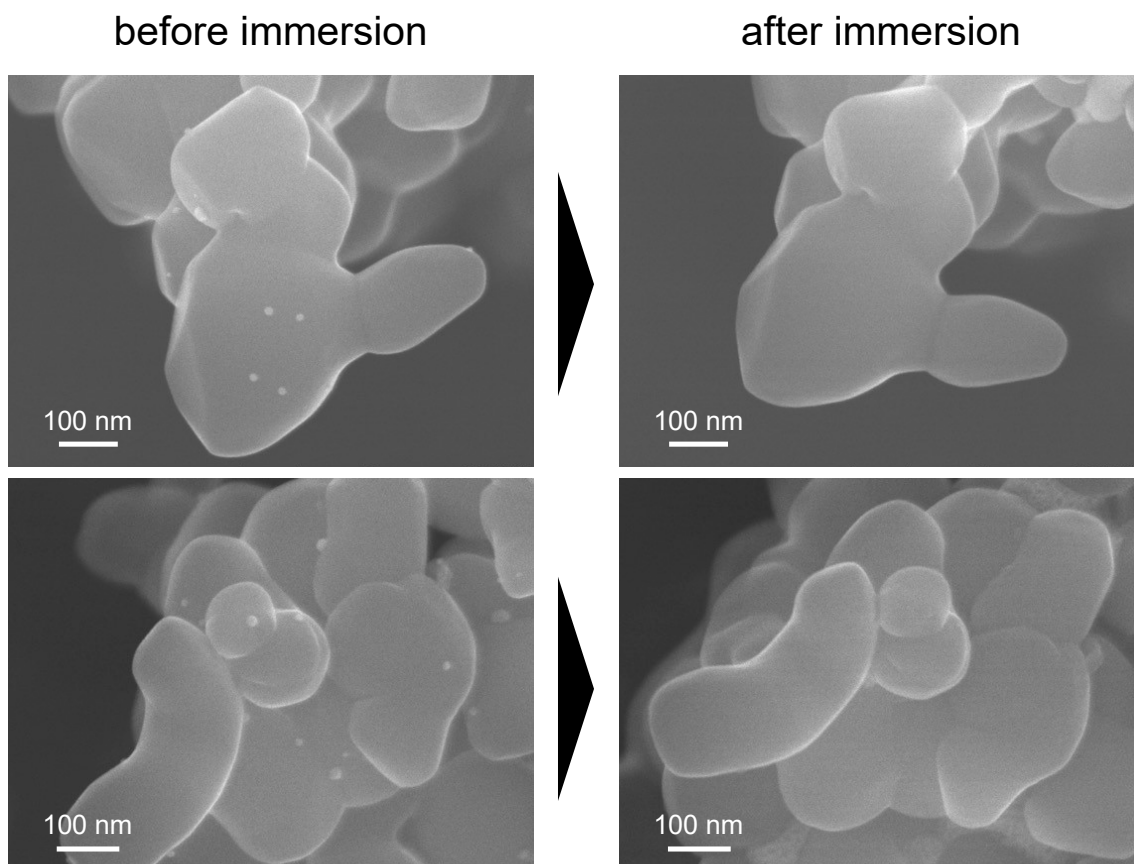

**Fig. S5.** SEM images of Au-TiO<sub>2</sub> sample on an adhesive carbon tape before and after immersion for 10 min in a solution containing I<sub>2</sub> and KI, in which Au is soluble. The sample was prepared by the PD method at 50 μmol L<sup>-1</sup> [AuCl<sub>4</sub>].
